# Supplementary material
Source: publisher figshare collection journal article supplement (https://acs.figshare.com/ndownloader/files/26779894)
Supplement: Supplementary file 1 [file 26779894]

## Supporting Information

### **In situ induced surface reconstruction of single crystal lithium-ion cathode towards effective interface compatibility**

Qingqing Zhang<sup>a</sup>, Kai Liu<sup>\*ab</sup>, Cheng Li<sup>c</sup>, Lu Li<sup>d</sup>, Xingjiang Liu<sup>b</sup>, Wei Li<sup>a</sup>, Jinli Zhang<sup>\*ae</sup>

<sup>a</sup>School of Chemical Engineering and Technology, Tianjin University, Tianjin 300350, P. R. China.

<sup>b</sup>National Key Laboratory of Science and Technology on Power Sources, Tianjin Institute of Power Sources, Tianjin 300384, P. R. China.

<sup>c</sup>Neutron Scattering Division, Oak Ridge National Laboratory, Oak Ridge, Tennessee 37831, United States.

<sup>d</sup>Guizhou Zhenhua New Material Co., Ltd, Guiyang 550016, P. R. China.

<sup>e</sup> School of Chemistry and Chemical Engineering, Shihezi University, Shihezi 832003, P. R. China.

\* Email: liukai\_tju\_edu\_cn@163.com; zhangjinli@tju.edu.cn

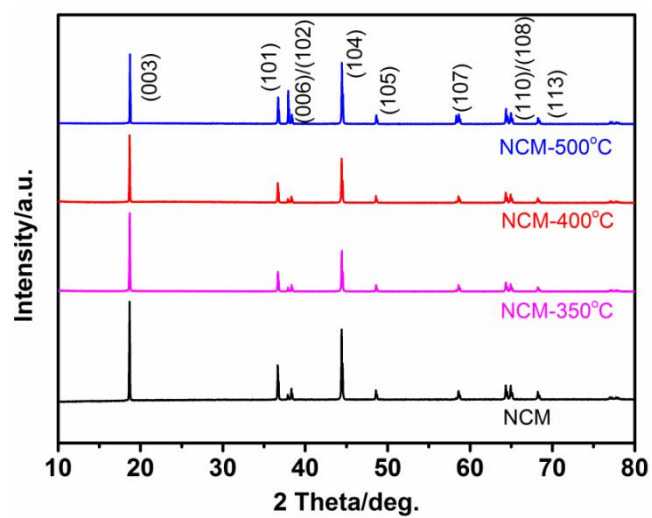

**Figure S1.** XRD patterns of NCM, NCM-350°C, NCM-400°C and NCM-500°C.

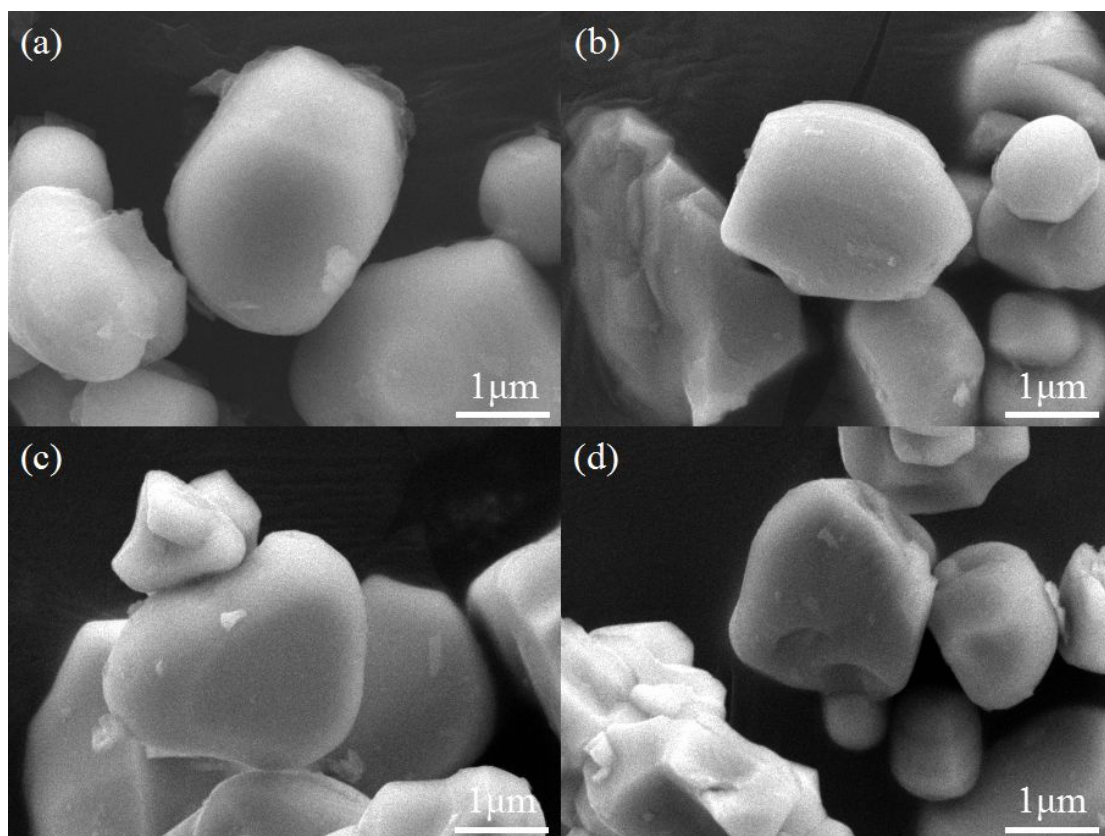

**Figure S2.** SEM image of (a) NCM, (b) NCM-350°C, (c) NCM-400°C and (d) NCM-500°C powder.

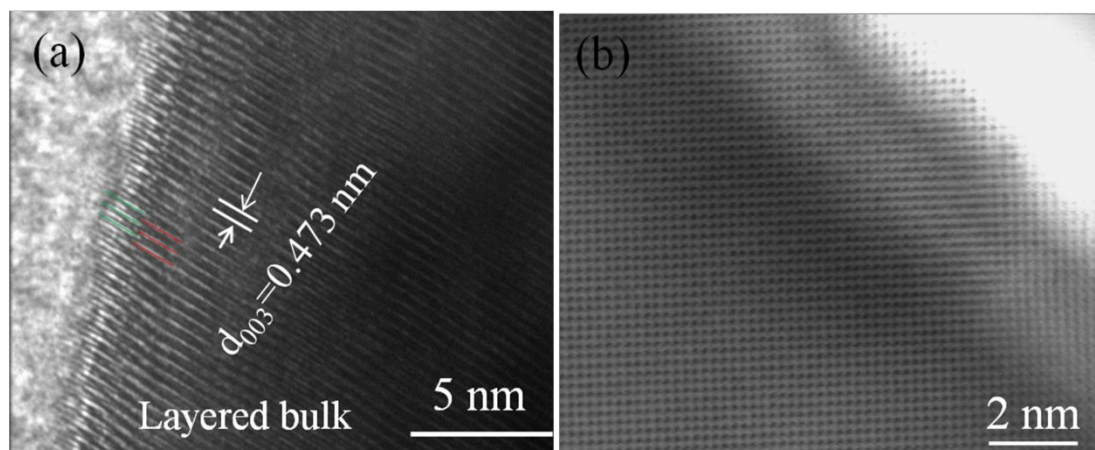

**Figure S3.** (a) HRTEM and (b) STEM image of NCM.

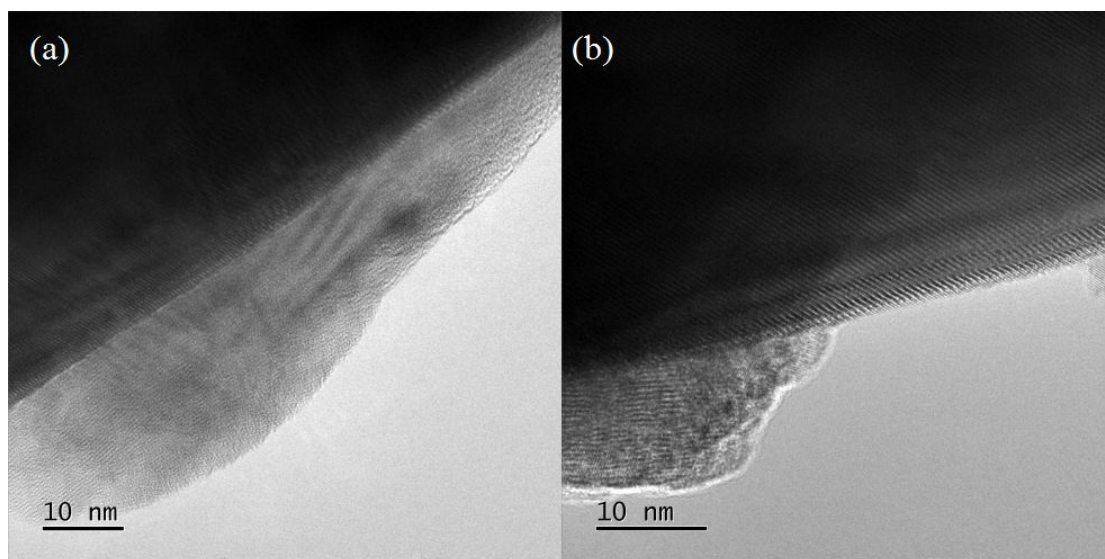

**Figure S4.** TEM images of NCM cathode at different locations.

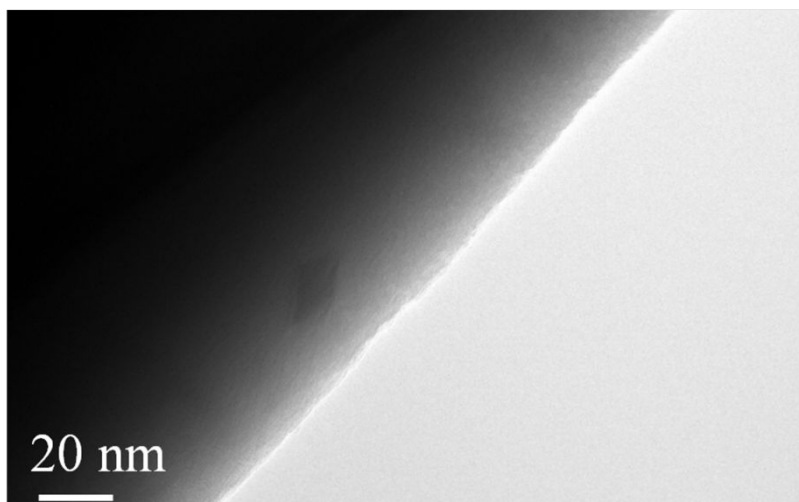

**Figure S5.** TEM image of NCM-400°C cathode at large area region with small magnification.

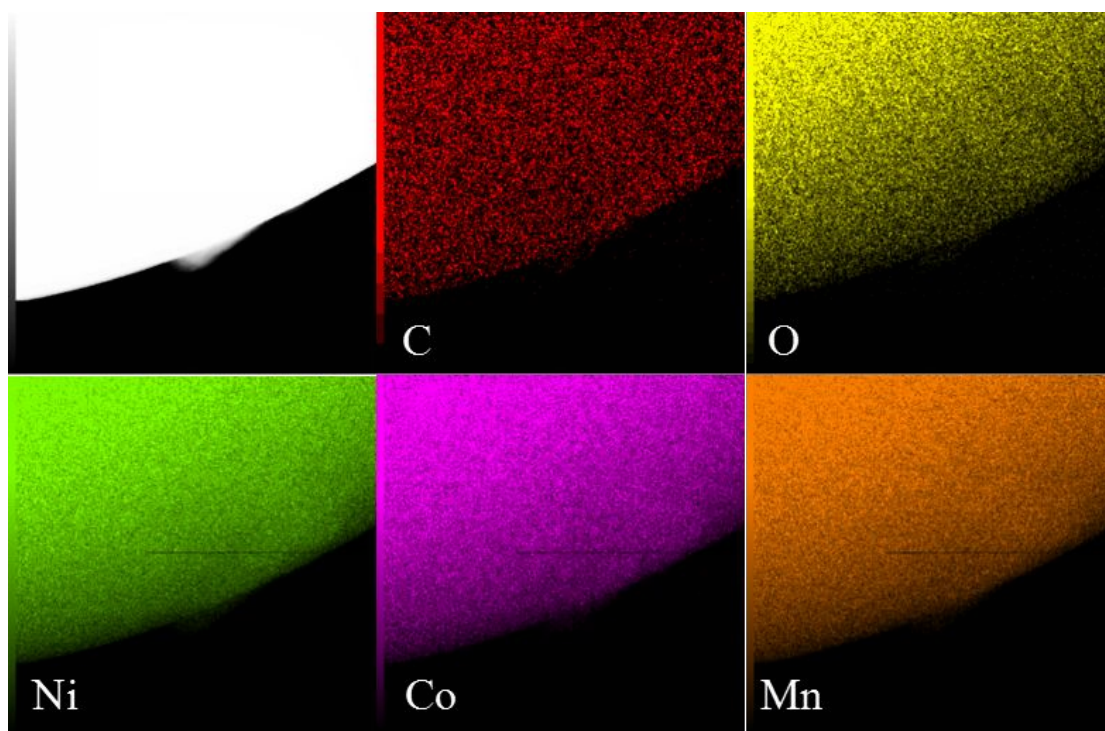

**Figure S6.** EDS elemental mapping of a NCM cathode particle.

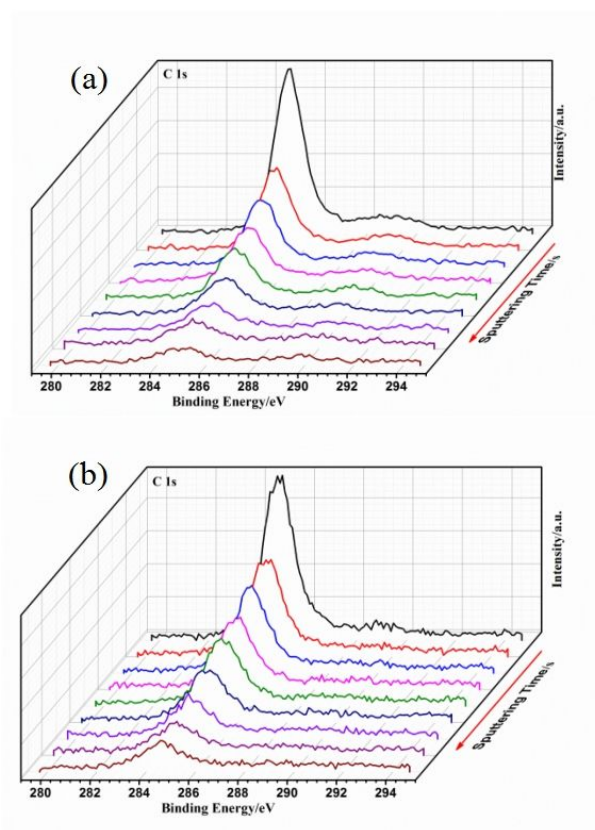

**Figure S7.** XPS spectra of C 1s for (a) NCM and (b) NCM-400°C with different sputtering time (0, 5, 10, 20, 30, 60, 120, 180, 240 s).



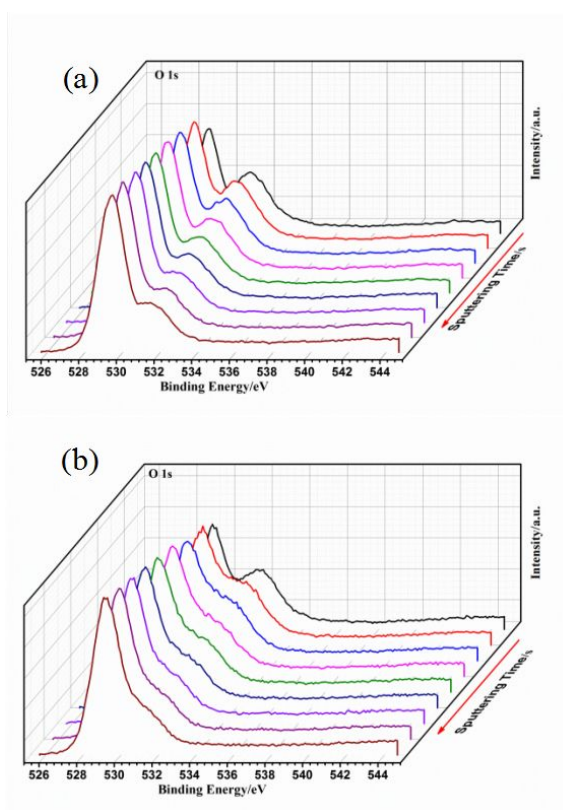

**Figure S8.** XPS spectra of O 1s for (a) NCM and (b) NCM-400°C with different sputtering time (0, 5, 10, 20, 30, 60, 120, 180, 240 s).

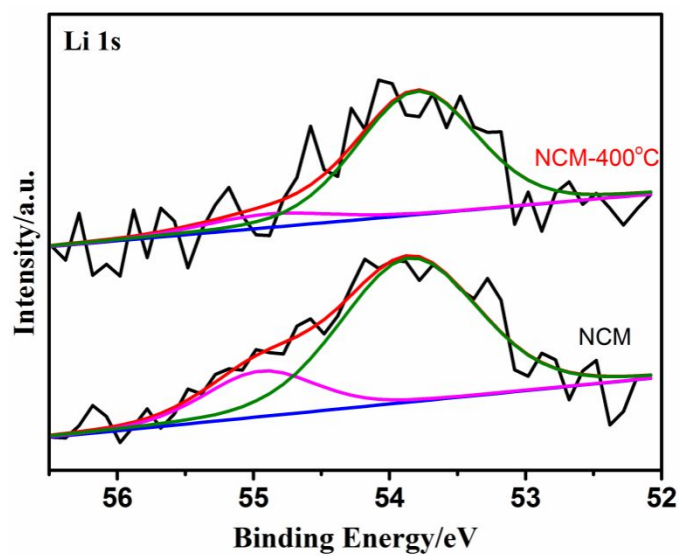

**Figure S9.** XPS spectra of Li 1s for NCM and NCM-400°C surface.

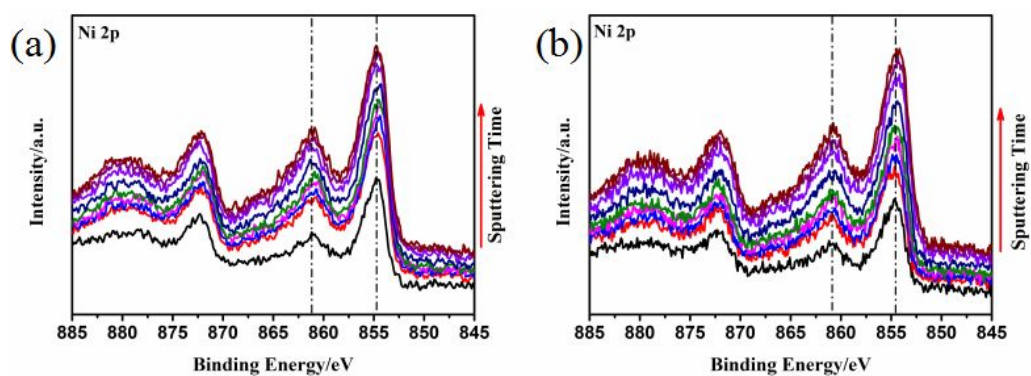

**Figure S10.** XPS spectra of Ni 2p for (a) NCM and (b) NCM-400°C with different sputtering time.

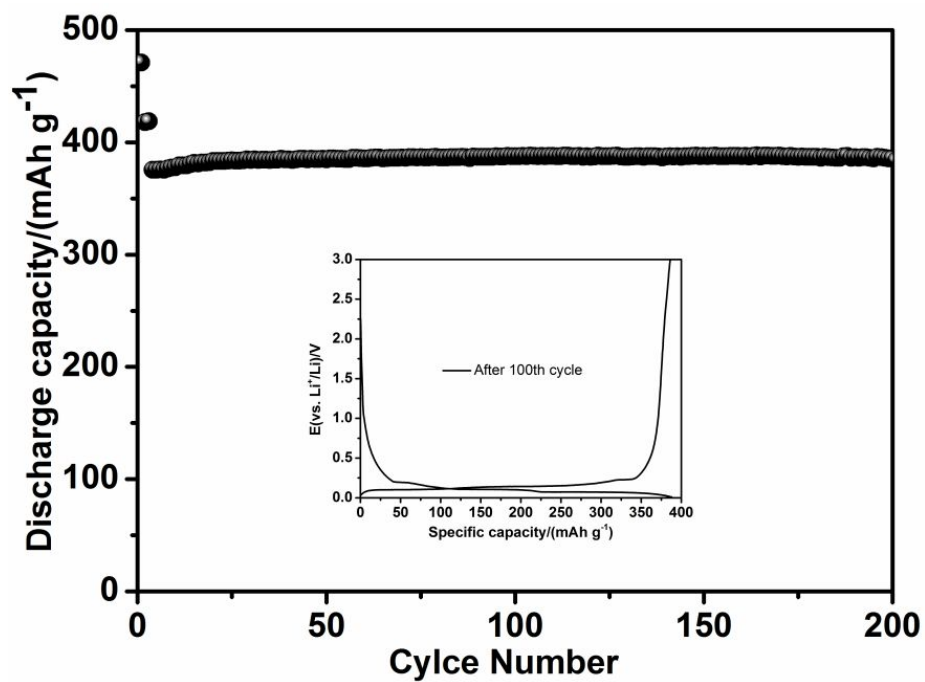

**Figure S11.** Cycling performance of graphite at 0.5 C and 25°C within a voltage range of 0.01-3.0 V in a half cell against lithium anodes.

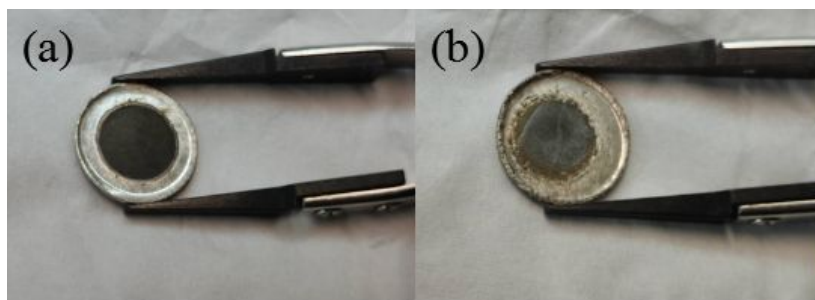

**Figure S12.** Digital images of lithium harvested from the disassembled cycled cells after 500 cycles at 5 C for (a) NCM and (b) NCM-400°C.

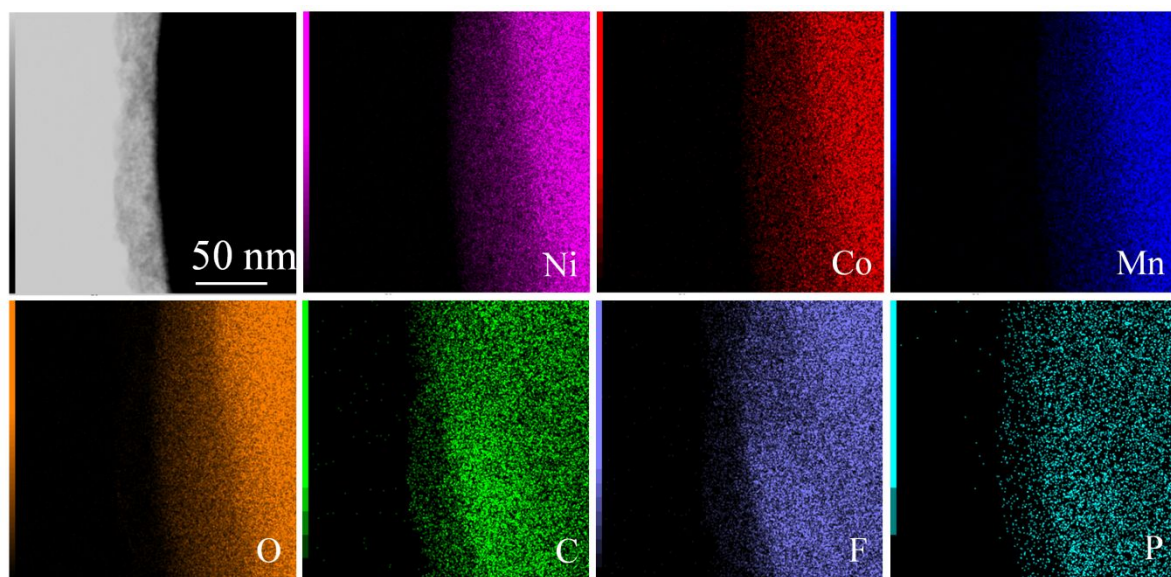

**Figure S13.** STEM-EDX elemental mapping of cycled NCM cathode particle.

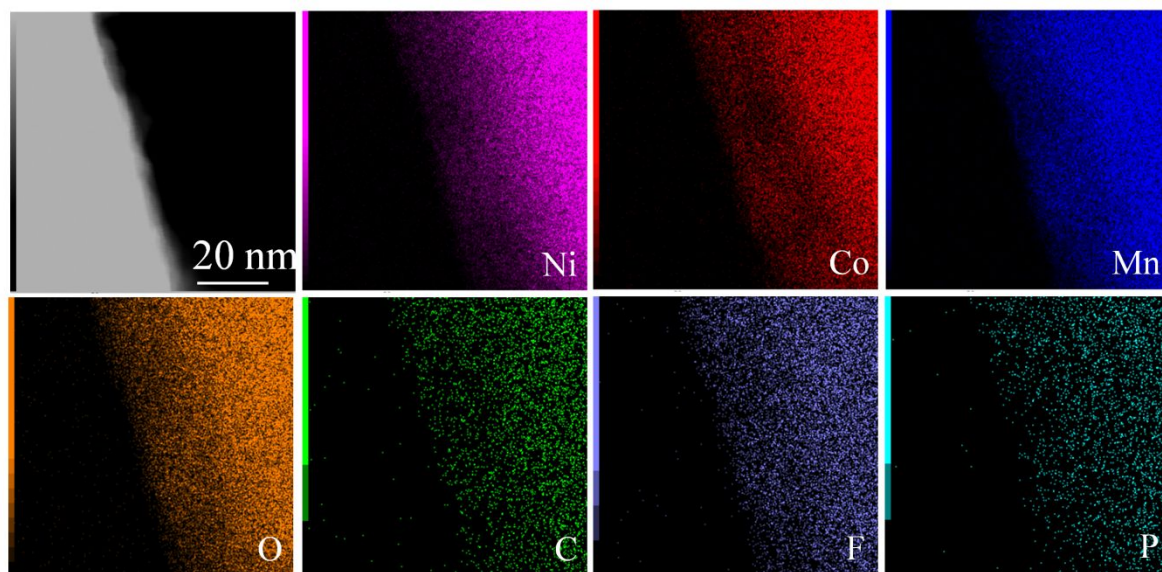

**Figure S14.** STEM-EDX elemental mapping of cycled NCM-400°C cathode particle.

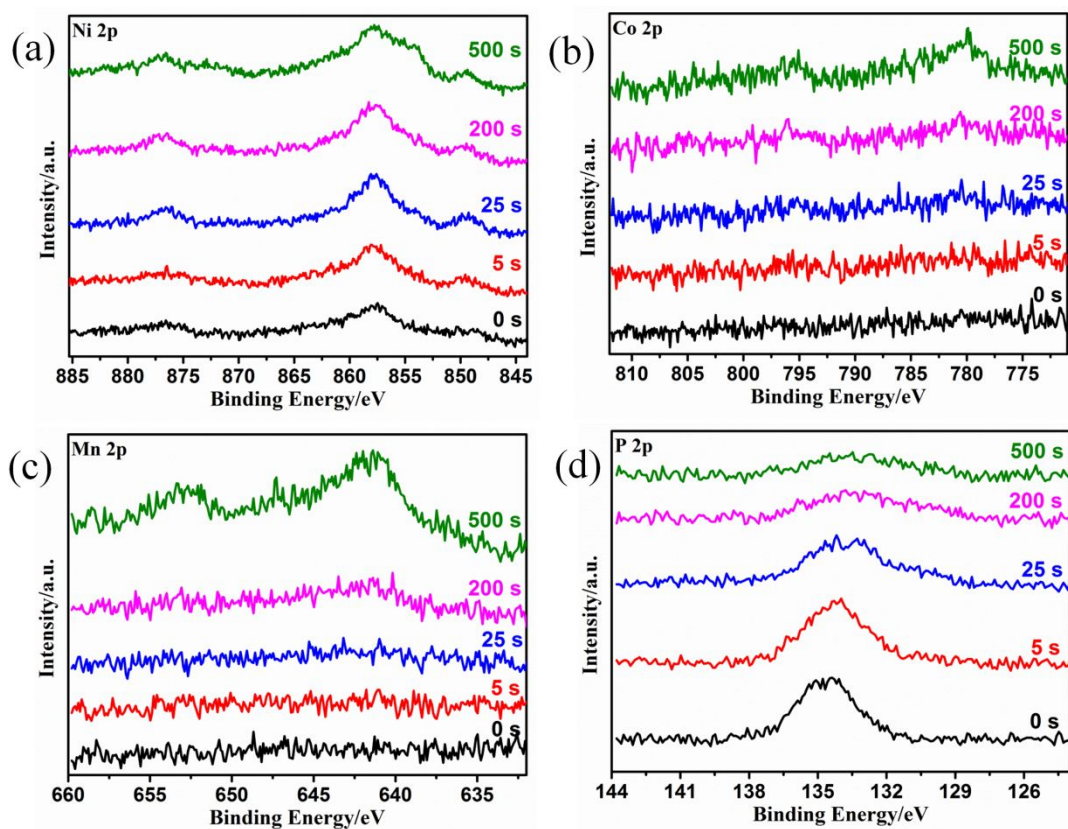

**Figure S15.** XPS spectra in argon atmosphere of (a) Ni 2p, (b) Co 2p, (c) Mn 2p and (d) P 2p for NCM after cycling at 5 C for 500 cycles.



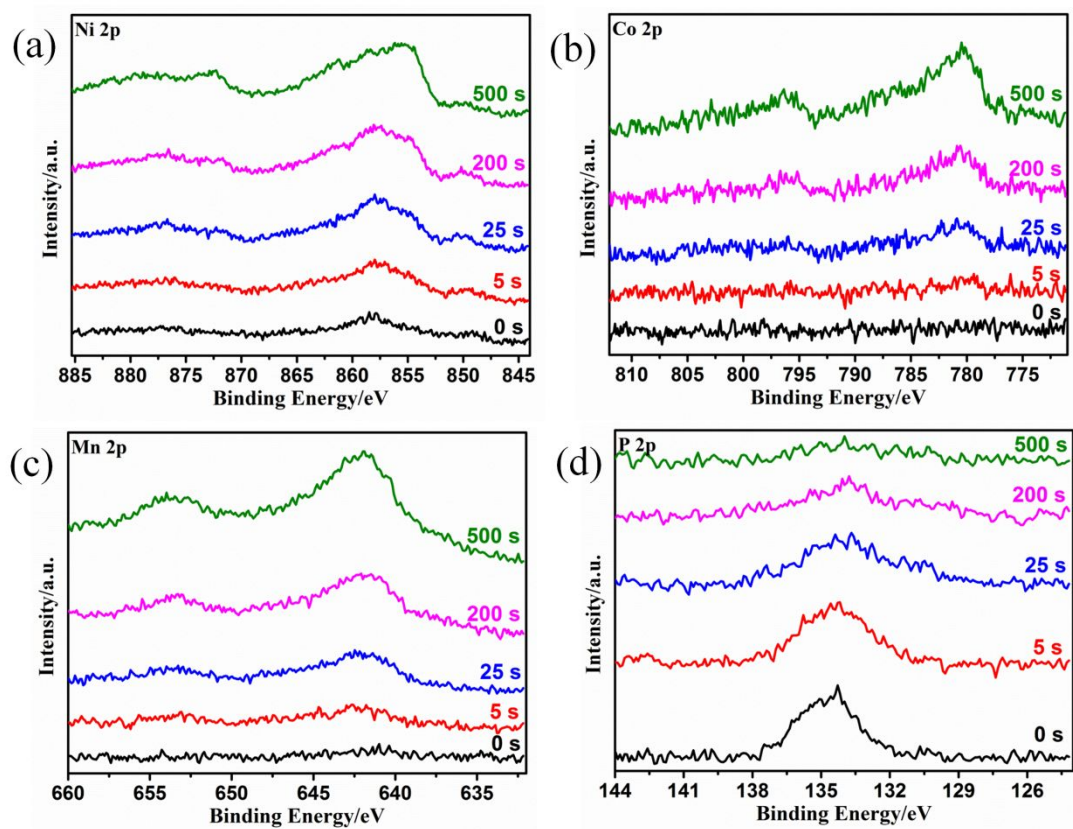

**Figure S16.** XPS spectra in argon atmosphere of (a) Ni 2p, (b) Co 2p, (c) Mn 2p and (d) P 2p for NCM-400°C after cycling at 5 C for 500 cycles.

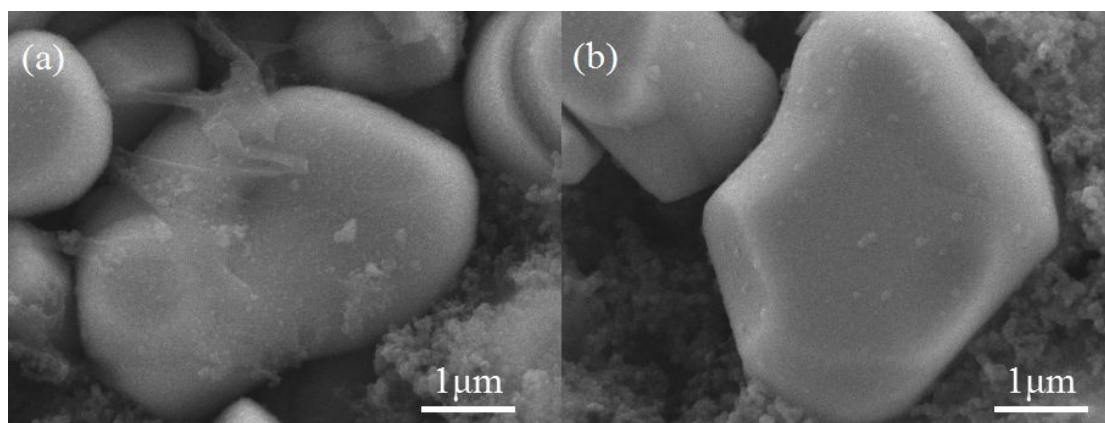

**Figure S17.** SEM image of cycled (a) NCM, and (b) NCM-400°C.
